# Supplementary material for: Synergism of multiple functional chromophores significantly enhancing the birefringence in layered non-centrosymmetric chalcohalides
Source: Royal Society of Chemistry journal article supplement (doi:10.1039/d0qi01318h), 2020-12-23
Supplement: d0qi01318h1.pdf [file d0qi01318h1.pdf]

***Electronic Supplementary Information:***

**Synergism of Multiple Functional Chromophores Significantly Enhancing the  
Birefringence in Layered Non-Centrosymmetric Chalcogenide**

Junben Huang,<sup>a,‡</sup> Jianian Cheng,<sup>a,‡</sup> Bing-Hua Lei,<sup>a,b</sup> Zhonglei Wei,<sup>a,b</sup> Shilie Pan,<sup>\*a</sup> and Zhihua Yang,<sup>\*a</sup>

<sup>a</sup> CAS Key Laboratory of Functional Materials and Devices for Special Environments, Xinjiang  
Technical Institute of Physics & Chemistry, CAS; Xinjiang Key Laboratory of Electronic Information  
Materials and Devices, Urumqi 830011, China

<sup>b</sup> Center of Materials Science and Optoelectronics Engineering, University of Chinese Academy of  
Sciences, Beijing 100049, China

<sup>‡</sup> These authors contributed equally.

\* E-mail: [slpan@ms.xjb.ac.cn](mailto:slpan@ms.xjb.ac.cn). Tel: (86) 991-3674558; Fax: (86) 991-3838957.

\* E-mail: [zhyang@ms.xjb.ac.cn](mailto:zhyang@ms.xjb.ac.cn). Tel: (86) 991-3859931; Fax: (86) 991-3835096.

**Contents**

**Table S1** Materials with experimentally measured birefringence larger than 0.100 and visible transmittance, which are containing one and two functional chromophores.

**Table S2** Calculated band gaps and experimental volumes of  $\text{Hg}_3\text{AsQ}_4\text{X}$  (Q = S, Se; X = Cl, Br, I).

**Figure S1** Calculated birefringence for  $\text{Hg}_3\text{AsQ}_4\text{X}$  (Q = S, Se; X = Cl, Br, I).

**Figure S2** Calculated band gaps of  $\text{Hg}_3\text{AsS}_4\text{Cl}$  (a),  $\text{Hg}_3\text{AsS}_4\text{Br}$  (b),  $\text{Hg}_3\text{AsSe}_4\text{Br}$  (c), and  $\text{Hg}_3\text{AsSe}_4\text{I}$  (d) by the GGA functional.

**Figure S3** Partial density of states of As  $4s4p$  orbitals of  $\text{Hg}_3\text{AsS}_4\text{Cl}$  (a),  $\text{Hg}_3\text{AsS}_4\text{Br}$  (b),  $\text{Hg}_3\text{AsSe}_4\text{Br}$  (c), and  $\text{Hg}_3\text{AsSe}_4\text{I}$  (d) by the GGA functional.

**Figure S4** Calculated charge density of  $\text{Hg}_3\text{AsS}_4\text{Cl}$  (a),  $\text{Hg}_3\text{AsS}_4\text{Br}$  (b),  $\text{Hg}_3\text{AsSe}_4\text{Br}$  (c), and  $\text{Hg}_3\text{AsSe}_4\text{I}$  (d).

**Figure S5** Electron localization function (ELF) of Hg<sub>3</sub>AsS<sub>4</sub>Cl (a), Hg<sub>3</sub>AsS<sub>4</sub>Br (b), Hg<sub>3</sub>AsSe<sub>4</sub>Br (c), and Hg<sub>3</sub>AsSe<sub>4</sub>I (d).

**Figure S6** Calculated dielectric function of Hg<sub>3</sub>AsS<sub>4</sub>Cl (a), Hg<sub>3</sub>AsS<sub>4</sub>Br (b), Hg<sub>3</sub>AsSe<sub>4</sub>Br (c), and Hg<sub>3</sub>AsSe<sub>4</sub>I (d).

**Figure S7** Calculated frequency-dependent SHG coefficients of AgGaS<sub>2</sub> ( $\chi^{(2)}_{312} = 2d_{36}$ ) from sum-over-states (SOS) approximation by the *ab-initio* method.

**Figure S8** SHG-density of occupied (left) and unoccupied (right) of Hg<sub>3</sub>AsS<sub>4</sub>Cl (a, b), Hg<sub>3</sub>AsS<sub>4</sub>Br (c, d), Hg<sub>3</sub>AsSe<sub>4</sub>Br (e, f), and Hg<sub>3</sub>AsSe<sub>4</sub>I (g, h) in the VE process.

**Table S1** Materials with experimentally measured birefringence larger than 0.100 and visible transmittance, which are containing one and two functional chromophores.

| Compounds                                                                             | Space groups      | $\Delta n$             | Band gap (eV) |
|---------------------------------------------------------------------------------------|-------------------|------------------------|---------------|
| One functional chromophore                                                            |                   |                        |               |
| $\text{NaNO}_2$ <sup>1</sup>                                                          | <i>Im2m</i>       | 0.30                   | 3.32          |
| $\text{Y}_2\text{C}_{12}\text{N}_{12}\text{O}_{24}\text{H}_{30}$ <sup>2</sup>         | <i>P-1</i>        | 0.274 (@ 3482 nm)      | 5.20          |
| $\text{Gd}_2\text{C}_{12}\text{N}_{12}\text{O}_{24}\text{H}_{30}$ <sup>2</sup>        | <i>P-1</i>        | 0.264 (@ 3874 nm)      | 5.29          |
| $\text{TiO}_2$ <sup>3</sup>                                                           | <i>P4_2/mnm</i>   | 0.256 (@ 1530 nm)      | 3.10          |
| $\text{LaC}_6\text{N}_6\text{O}_9\text{H}_9$ <sup>2</sup>                             | <i>P2_1/c</i>     | 0.233 (@ 1912 nm)      | 5.00          |
| $\text{TbVO}_4$ <sup>4</sup>                                                          | <i>I4_1/amd</i>   | 0.22 (@ 1064 nm)       | 2.79          |
| $\text{RbNa}(\text{HC}_3\text{N}_3\text{O}_3) \cdot 2\text{H}_2\text{O}$ <sup>5</sup> | <i>Pna2_1</i>     | 0.194 (@ 1922 nm)      | 5.10          |
| $\text{LiNa}_5\text{Mo}_9\text{O}_{30}$ <sup>6</sup>                                  | <i>Fdd2</i>       | 0.1935 (@ 1062.6 nm)   | 3.47          |
| $\text{KLi}(\text{HC}_3\text{N}_3\text{O}_3) \cdot 2\text{H}_2\text{O}$ <sup>7</sup>  | <i>Pna2_1</i>     | 0.186 (@ 514 nm)       | 5.23          |
| $\text{C}_6\text{H}_7\text{O}_6\text{Li} \cdot \text{H}_2\text{O}$ <sup>8</sup>       | <i>P2_12_12_1</i> | 0.174□ (@ 1064 nm)     | 4.20          |
| $\text{CaCO}_3$ <sup>9</sup>                                                          | <i>R-3c</i>       | 0.172 (@ 1064 nm)      | 5.39          |
| $\text{Sn}_2\text{B}_5\text{O}_9\text{Cl}$ <sup>10</sup>                              | <i>Pnn2</i>       | 0.168 (@ 546 nm)       | 3.53          |
| $\alpha\text{-LiIO}_3$ <sup>11</sup>                                                  | <i>P63</i>        | 0.1401 (@ 1064 nm)     | 4~4.5         |
| $\text{KNbO}_3$ <sup>12</sup>                                                         | <i>Amm2</i>       | 0.1323 (@ 1064 nm)     | 3.1□0         |
| $\text{KIO}_3$ <sup>13, 11b</sup>                                                     | <i>R3m</i>        | 0.1276 (@ 1064 nm)     | 3~4.5         |
| $\text{Ca}(\text{BO}_2)_2$ <sup>14</sup>                                              | <i>Pbcn</i>       | 0.124 (@ 1064 nm)      | 7.34          |
| $\text{Ba}_2\text{Ca}(\text{B}_3\text{O}_6)_2$ <sup>15</sup>                          | <i>R-3</i>        | 0.1241 (@ 589.3 nm)    | 6.97          |
| $\text{GdAl}_3(\text{BO}_3)_4$ <sup>16</sup>                                          | <i>R32</i>        | 0.12                   | 7.09          |
| $\text{RbBaYB}_6\text{O}_{12}$ <sup>17</sup>                                          | <i>R-3</i>        | 0.120 (@ 589 nm)       | 6.36          |
| $\text{CsBaYB}_6\text{O}_{12}$ <sup>17</sup>                                          | <i>R-3</i>        | 0.120 (@ 589 nm)       | 6.39          |
| $\alpha\text{-BaB}_2\text{O}_4$ <sup>9a</sup>                                         | <i>R-3c</i>       | 0.116 (@ 1064 nm)      | 6.56          |
| $\text{Na}_3\text{Ba}_2(\text{B}_3\text{O}_6)_2\text{F}$ <sup>18</sup>                | <i>P6_3/m</i>     | 0.1149 (@ 532 nm)      | 7.09          |
| $\beta\text{-BaB}_2\text{O}_4$ <sup>19, 11b</sup>                                     | <i>R3c</i>        | 0.1125 (@ 1064 nm)     | 7.00          |
| $\text{Te}_2\text{P}_2\text{O}_9$ <sup>20</sup>                                       | <i>Cc</i>         | 0.10615 (@ 1013.98 nm) | 4.30          |
| $\text{KTiOAsO}_4$ <sup>19, 11b</sup>                                                 | <i>Pna2_1</i>     | 0.106 (@ 1064 nm)      | 3.60          |
| $\text{KSrCO}_3\text{F}$ <sup>21</sup>                                                | <i>P-6m2</i>      | 0.1049 (@ 1064 nm)     | 6.36          |
| $\text{Ba}_2\text{Mg}(\text{BO}_3)_2$ <sup>22</sup>                                   | <i>R-3m</i>       | 0.10422 (@ 546 nm)     | 6.63          |
| Two functional chromophores                                                           |                   |                        |               |
| $\text{Sb}[\text{NH}_2\text{CSNH}_2]_2\text{Br}_3$ <sup>23</sup>                      | <i>Cmc2_1</i>     | 0.428 (@ 589.3 nm)     | 4.96□         |
| $\text{SbB}_3\text{O}_6$ <sup>24</sup>                                                | <i>C2</i>         | 0.290 (@ 546 nm)       | 3.95          |
| $\alpha\text{-BaTeW}_2\text{O}_9$ <sup>25</sup>                                       | <i>Pnma</i>       | 0.247 (@ 404.7 nm)     | 3.42          |
| $\beta\text{-BaTeMo}_2\text{O}_9$ <sup>26</sup>                                       | <i>P2_1</i>       | 0.226 (@ 1068 nm)      | 3.10          |
| $\text{CdTeMoO}_6$ <sup>27</sup>                                                      | <i>P-42_1m</i>    | 0.2222 (@ 1311 nm)     | 3.59          |
| $\alpha\text{-BaTeMo}_2\text{O}_9$ <sup>28</sup>                                      | <i>Pca2_1</i>     | 0.20689 (@ 1064 nm)    | 3.12          |
| $\alpha\text{-BiB}_3\text{O}_6$ <sup>29</sup>                                         | <i>C2</i>         | 0.1747 (@ 1064 nm)     | 4.32          |
| $\text{Cs}_2\text{TeW}_3\text{O}_{12}$ <sup>30</sup>                                  | <i>P6_3</i>       | 0.1648 (@ 1013.98 nm)  | 3.02          |
| $\text{Cs}_2\text{TeMo}_3\text{O}_{12}$ <sup>31</sup>                                 | <i>P6_3</i>       | 0.1476 (@ 1014 nm)     | 2.88          |
| $\text{Na}_2\text{TeW}_2\text{O}_9$ <sup>32</sup>                                     | <i>Cc</i>         | 0.1471 (@ 1062.6 nm)   | 3.47          |
| $\text{YVO}_4$ <sup>9a</sup>                                                          | <i>I4_1/amd</i>   | 0.208 (@ 1064 nm)      | 3.1□0         |

| Compounds                                                                     | Space groups             | $\Delta n$         | Band gap (eV) |
|-------------------------------------------------------------------------------|--------------------------|--------------------|---------------|
| $\text{NH}_4\text{B}_4\text{O}_6\text{F}$ <sup>33</sup>                       | <i>Pna2</i> <sub>1</sub> | 0.1171 (@ 1064 nm) | 7.95          |
| $\text{CsB}_4\text{O}_6\text{F}$ <sup>34</sup>                                | <i>Pna2</i> <sub>1</sub> | 0.114 (@ 1064 nm)  | 8.00          |
| $[\text{Al}(\text{H}_2\text{O})_6](\text{IO}_3)_2(\text{NO}_3)$ <sup>35</sup> | <i>P-3m1</i>             | 0.253 (@ 546 nm)   | 4.00          |

**Table S2** Calculated band gaps and experimental volumes of  $\text{Hg}_3\text{AsQ}_4\text{X}$  (Q = S, Se; X = Cl, Br, I).

| Compounds                           | Band gap (eV) |      |       | Volume ( $\text{\AA}^3$ ) |
|-------------------------------------|---------------|------|-------|---------------------------|
|                                     | LDA           | GGA  | HSE06 |                           |
| $\text{Hg}_3\text{AsS}_4\text{Cl}$  | 1.34          | 1.83 | 2.34  | 430.539                   |
| $\text{Hg}_3\text{AsS}_4\text{Br}$  | 1.42          | 1.84 | 2.44  | 447.682                   |
| $\text{Hg}_3\text{AsSe}_4\text{Br}$ | 1.24          | 1.77 | 2.02  | 487.034                   |
| $\text{Hg}_3\text{AsSe}_4\text{I}$  | 1.39          | 1.68 | 1.93  | 510.496                   |

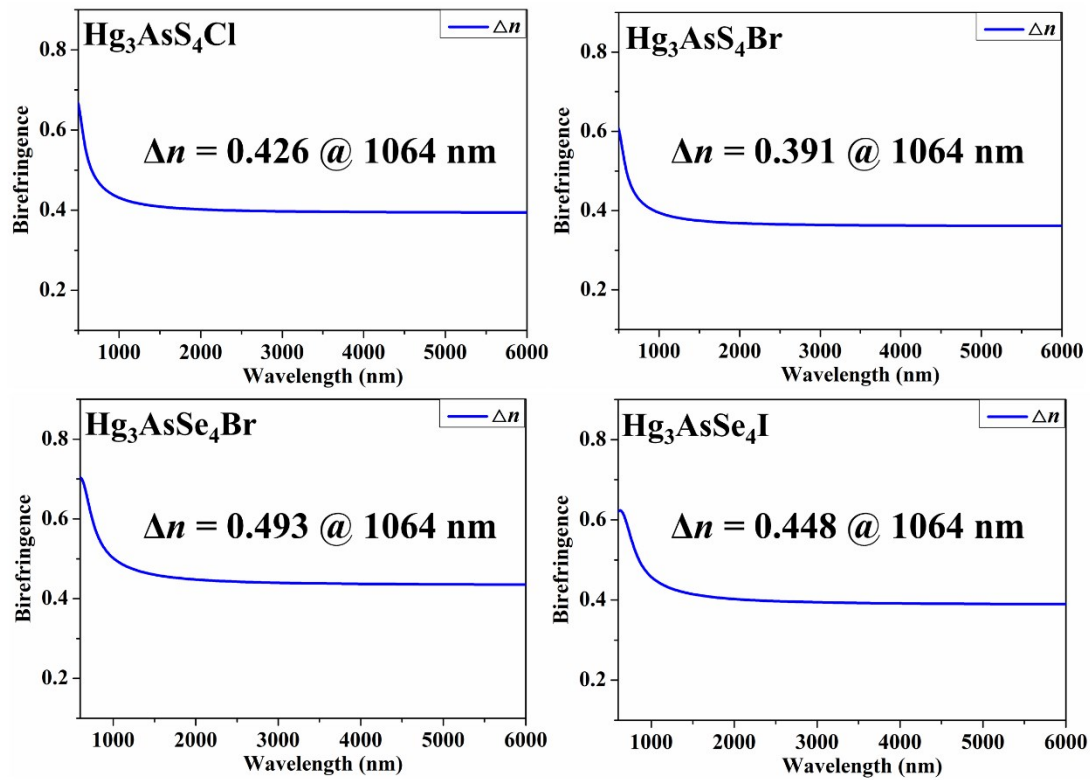

**Figure S1** Calculated birefringence for  $\text{Hg}_3\text{AsQ}_4\text{X}$  (Q = S, Se; X = Cl, Br, I).

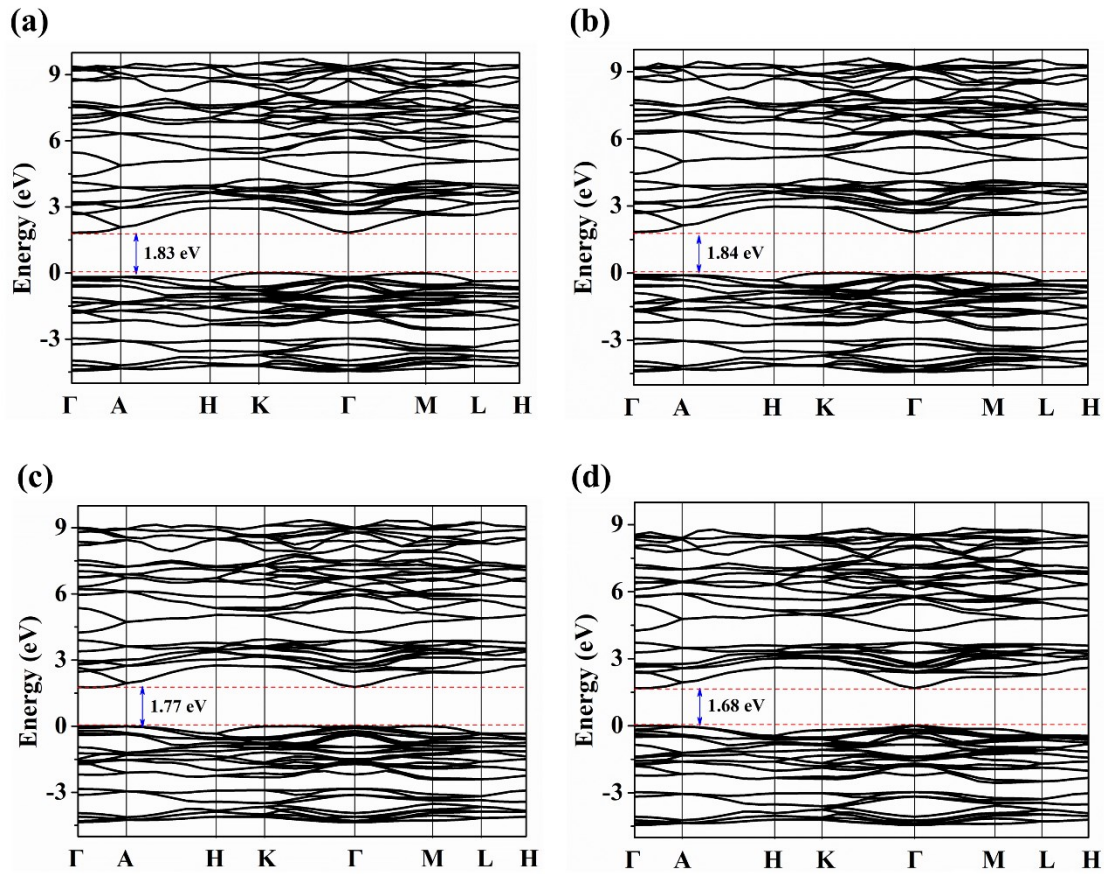

**Figure S2** Calculated band gaps of  $\text{Hg}_3\text{AsS}_4\text{Cl}$  (a),  $\text{Hg}_3\text{AsS}_4\text{Br}$  (b),  $\text{Hg}_3\text{AsSe}_4\text{Br}$  (c), and  $\text{Hg}_3\text{AsSe}_4\text{I}$  (d) by the GGA functional.

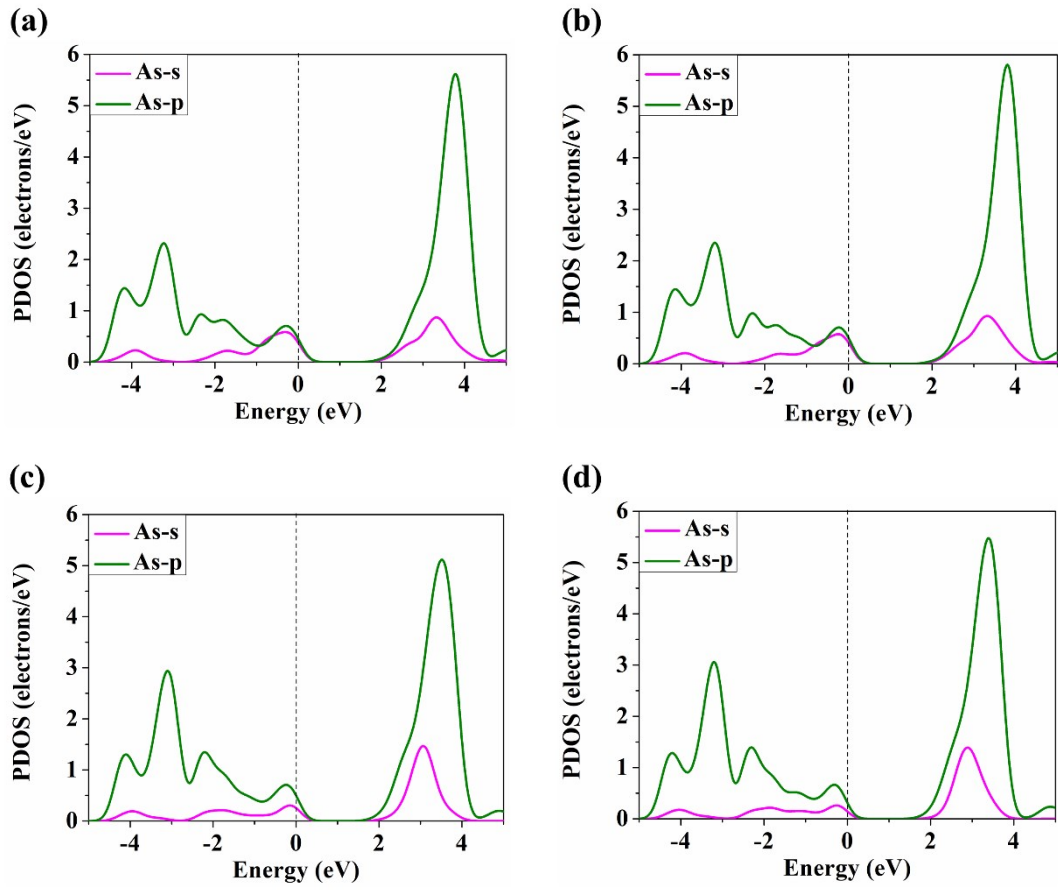

**Figure S3** Partial density of states of As  $4s4p$  orbitals of  $\text{Hg}_3\text{AsS}_4\text{Cl}$  (a),  $\text{Hg}_3\text{AsS}_4\text{Br}$  (b),  $\text{Hg}_3\text{AsSe}_4\text{Br}$  (c), and  $\text{Hg}_3\text{AsSe}_4\text{I}$  (d) by the GGA functional.

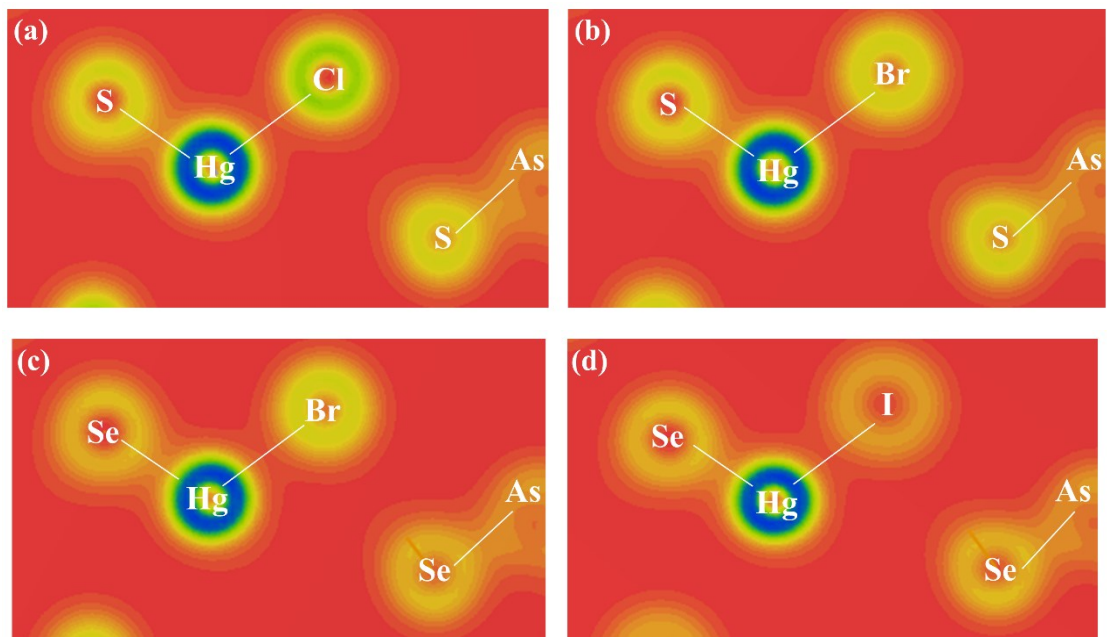

**Figure S4** Calculated charge density of Hg<sub>3</sub>AsS<sub>4</sub>Cl (a), Hg<sub>3</sub>AsS<sub>4</sub>Br (b), Hg<sub>3</sub>AsSe<sub>4</sub>Br (c), and Hg<sub>3</sub>AsSe<sub>4</sub>I (d).



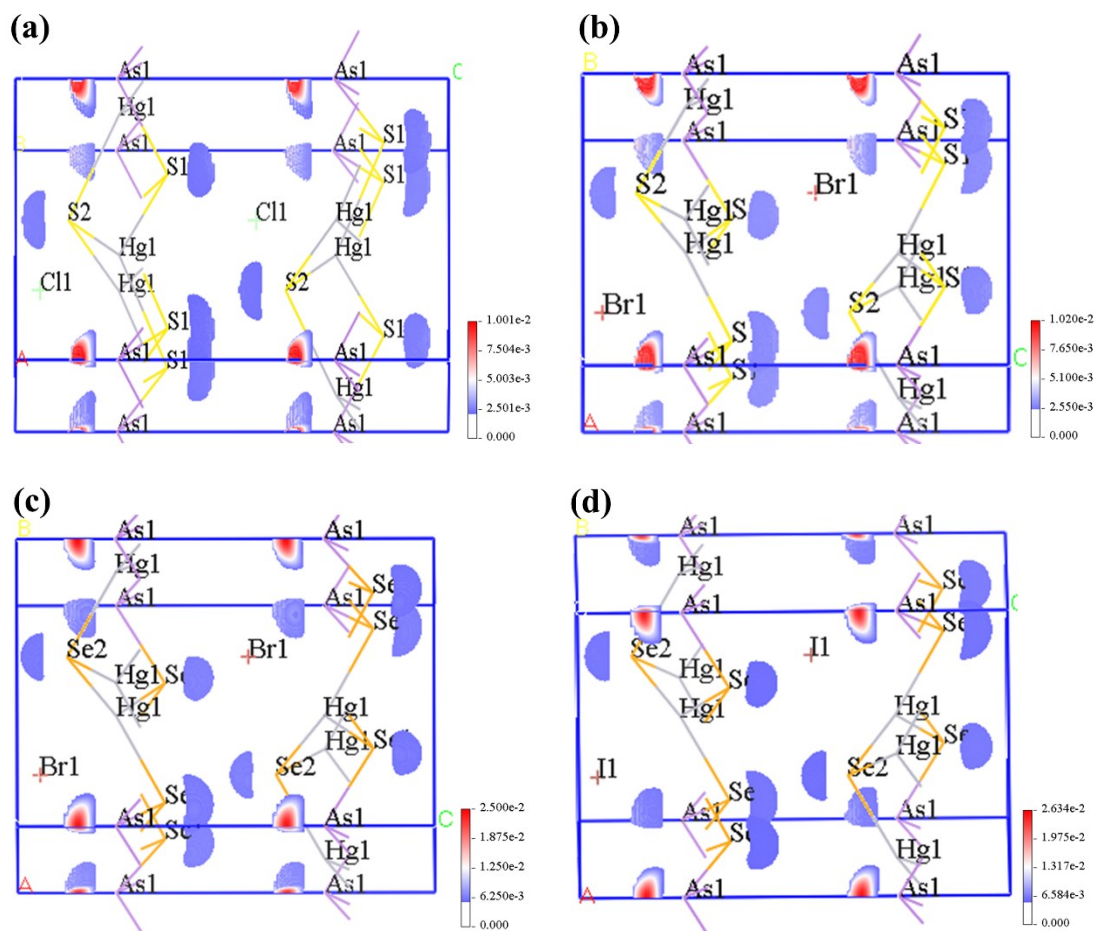

**Figure S5** Electron localization function (ELF) of  $\text{Hg}_3\text{AsS}_4\text{Cl}$  (a),  $\text{Hg}_3\text{AsS}_4\text{Br}$  (b),  $\text{Hg}_3\text{AsSe}_4\text{Br}$  (c), and  $\text{Hg}_3\text{AsSe}_4\text{I}$  (d).

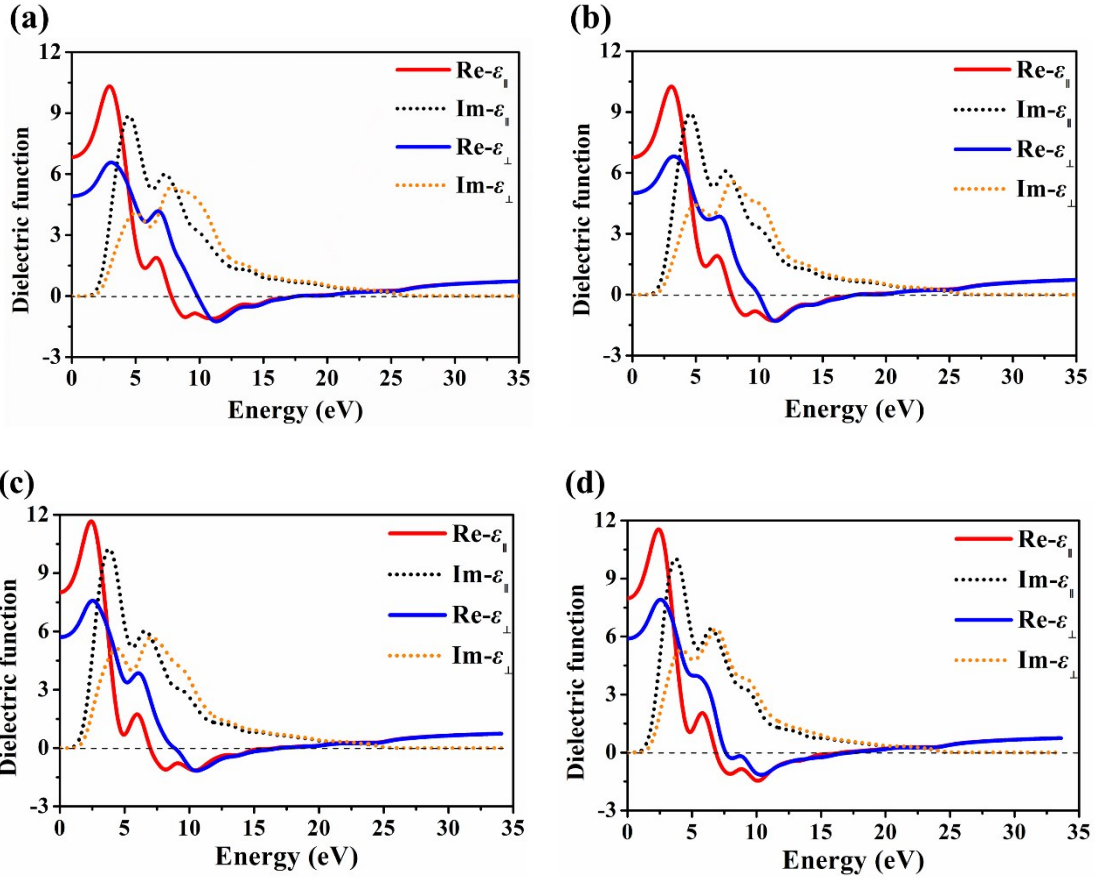

**Figure S6** Calculated dielectric function of  $\text{Hg}_3\text{AsS}_4\text{Cl}$  (a),  $\text{Hg}_3\text{AsS}_4\text{Br}$  (b),  $\text{Hg}_3\text{AsSe}_4\text{Br}$  (c), and  $\text{Hg}_3\text{AsSe}_4\text{I}$  (d).

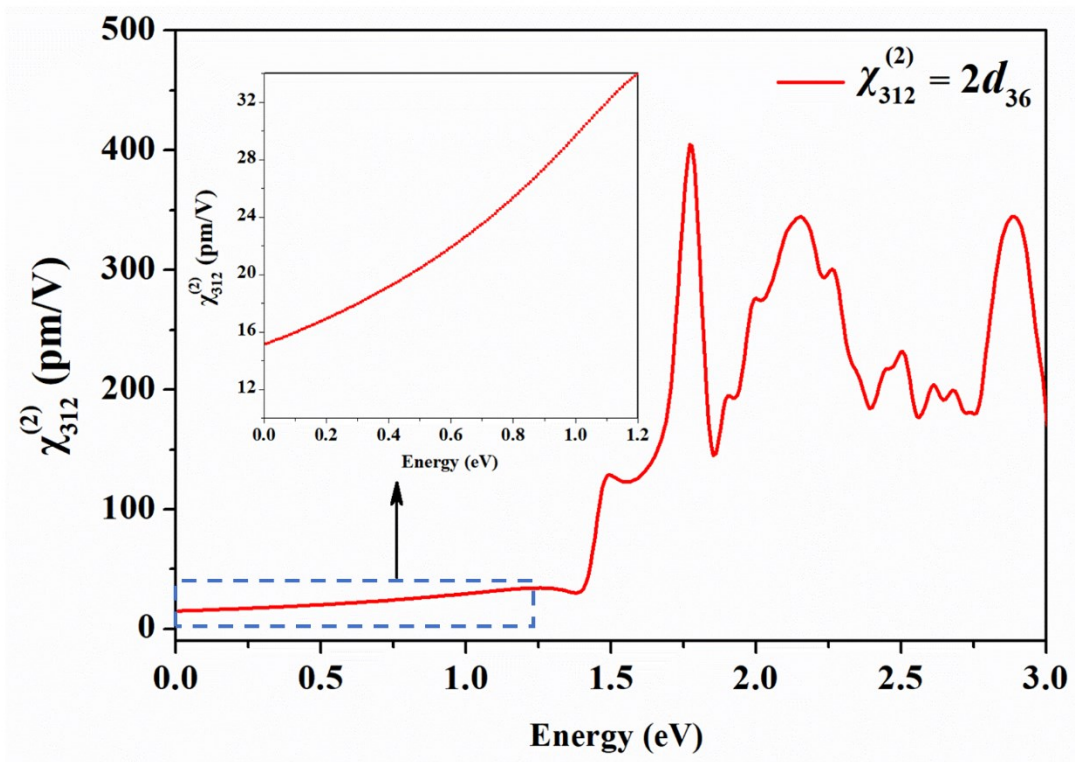

**Figure S7** Calculated frequency-dependent SHG coefficients of  $\text{AgGaS}_2$  ( $\chi_{312}^{(2)} = 2d_{36}$ ) from sum-over-states (SOS) approximation by the *ab-initio* method.

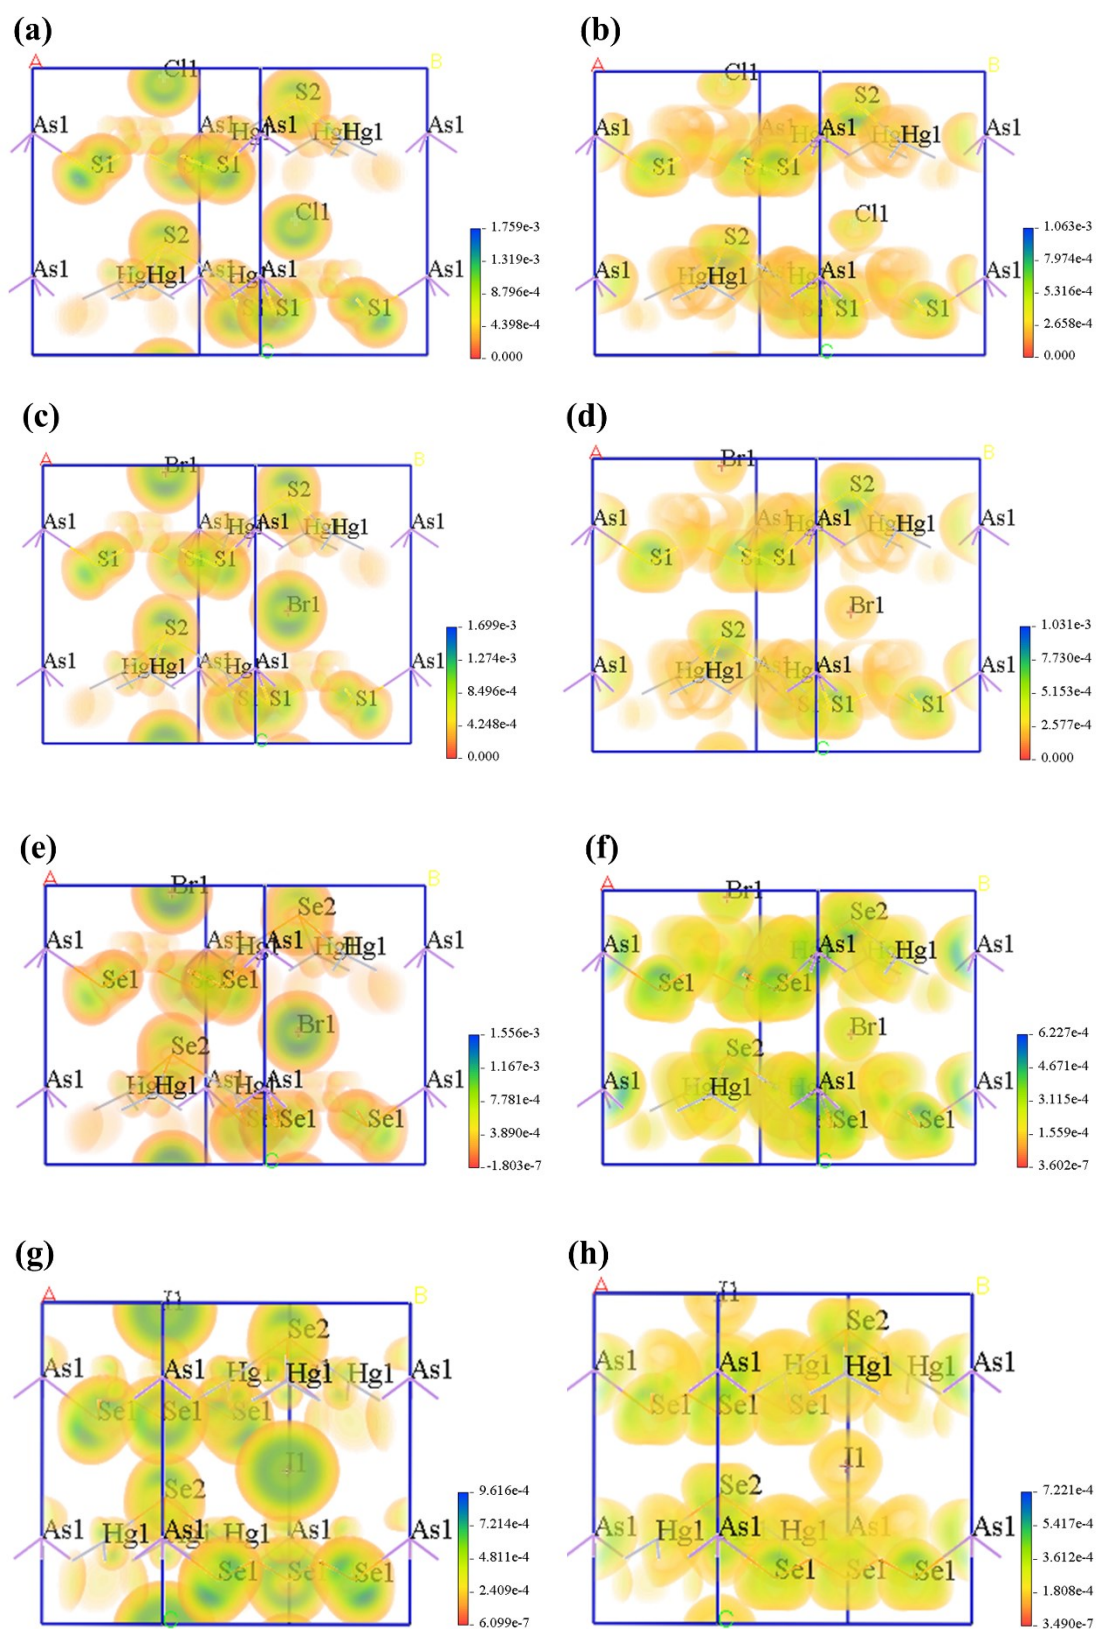

**Figure S8** SHG-density of occupied (left) and unoccupied (right) of  $\text{Hg}_3\text{As}_4\text{Cl}$  (a, b),  $\text{Hg}_3\text{As}_4\text{Br}$  (c, d),  $\text{Hg}_3\text{AsSe}_4\text{Br}$  (e, f), and  $\text{Hg}_3\text{AsSe}_4\text{I}$  (g, h) in the VE process.

## Reference

- 1 (a) K. C. Wu and C. T. Chen, *Appl. Phys. A*, 1992, **54**, 209-220. (b) K. C. Wu and C. T. Chen, *J. Cryst. Growth*, 1996, **166**, 533-536.
- 2 X. Hao, M. Luo, C. S. Lin, D. H. Lin, L. L. Cao and N. Ye, *Dalton Trans.*, 2019, **48**, 12296-12302.
- 3 J. R. Devore, *J. Opt. Soc. Am.*, 1951, **41**, 416-419.
- 4 Y. Y. Zhu, H. Tu, L. S. Jia, Y. C. Yue, Y. Zhao and Z. G. Hu, *Opt. Mater.*, 2017, **65**, 106-111.
- 5 Y. X. Song, D. H. Lin, M. Luo, C. S. Lin, Q. L. Chen and N. Ye, *Inorg. Chem. Front.*, 2020, **7**, 150-156.
- 6 W. G. Zhang, H. W. Yu, J. Cantwell, H. P. Wu, K. R. Poeppelmeier and P. S. Halasyamani, *Chem. Mater.*, 2016, **28**, 4483-4491.
- 7 D. H. Lin, M. Luo, C. S. Lin, F. Xu and N. Ye, *J. Am. Chem. Soc.*, 2019, **141**, 3390-3394.
- 8 K. R. Rao, C. Aneesh, H. L. Bhat, S. Elizabeth, M. S. Pavan and T. N. G. Row, *Cryst. Growth Des.*, 2013, **13**, 97-105.
- 9 (a) G. Q. Zhou, J. Xu, X. D. Chen, H. Y. Zhong, S. T. Wang, K. Xu, P. Z. Deng and F. X. Gan, *J. Cryst. Growth*, 1998, **191**, 517-519. (b) G. Ghosh, *Opt. Commun.*, 1999, **163**, 95-102.
- 10 J. Y. Guo, T. Abudukadi, S. J. Han, Z. H. Yang and S. L. Pan, *Angew. Chem. Int. Ed.*, 2019, **58**, 17675-17678.
- 11 (a) P. Hermet, *Comp. Mater. Sci.*, 2017, **138**, 199-203. (b) K. C. Zhang and X. M. Wang, *Nonlinear Optics Crystal Materials Science*. Science Press, 2006.
- 12 (a) T. Fukuda and Y. Uematsu, *Jpn. J. Appl. Phys.*, 1972, **11**, 163-169. (b) M. Sheik-Bahae and M. Ebrahimzadeh, *Opt. Commun.*, 1997, **142**, 294-298.
- 13 B. Erdinc and H. Akkus, *J. Phys.: Condens. Matter.*, 2009, **21**, 125503-125509.
- 14 X. L. Chen, B. B. Zhang, F. F. Zhang, Y. Wang, M. Zhang, Z. H. Yang, K. R. Poeppelmeier and S. L. Pan, *J. Am. Chem. Soc.*, 2018, **140**, 16311-16319.
- 15 Z. Jia, N. N. Zhang, Y. Y. Ma, L. W. Zhao, M. J. Xia and R. K. Li, *Cryst. Growth Des.*, 2017, **17**, 558-562.
- 16 Y. C. Yue, Y. Y. Zhu, Y. Zhao, H. Tu and Z. G. Hu, *Cryst. Growth Des.*, 2016, **16**, 347-350.
- 17 X. L. Chen, F. F. Zhang, Y. J. Shi, Y. Z. Sun, Z. H. Yang and S. L. Pan, *Dalton Trans.*, 2018, **47**, 750-757.
- 18 H. Zhang, M. Zhang, S. L. Pan, Z. H. Yang, Z. Wang, Q. Bian, X. L. Hou, H. W. Yu, F. F. Zhang, K. Wu, F. Yang, Q. J. Peng, Z. Y. Xu, K. B. Chang and K. R. Poeppelmeier, *Cryst. Growth Des.*, 2015, **15**, 523-529.
- 19 H. P. Li, C. H. Kam, Y. L. Lam and W. Ji, *Opt. Mater.*, 2001, **15**, 237-242.
- 20 W. M. Dong, Q. Yao, J. Y. Zhang, L. T. Liu, J. Li and J. Y. Wang, *Cryst. Growth Des.*, 2018, **18**, 5919-5926.
- 21 W. G. Zhang and P. S. Halasyamani, *CrystEngComm.*, 2017, **19**, 4742-4748.
- 22 X. S. Lv, P. Wang, H. J. Yu, Y. Y. Hu, H. D. Zhang, C. C. Qiu, J. Li, X. P. Wang, B. Liu and Y. Y. Zhang, *Opt. Mater. Express*, 2019, **9**, 3835-3842.
- 23 N. Karthick, R. Sankar, R. Jayavel and S. Pandi, *J. Cryst. Growth*, 2009, **312**, 114-119.
- 24 Y. C. Liu, X. M. Liu, S. Liu, Q. R. Ding, Y. Q. Li, L. N. Li, S. G. Zhao, Z. S. Lin, J. H. Luo and M. C. Hong, *Angew. Chem. Int. Ed.*, 2020, **59**, 7793-7796.
- 25 Z. H. Zhang, X. T. Tao, J. J. Zhang, Y. X. Sun, C. Q. Zhang and B. Li, *CrystEngComm.*, 2013, **15**, 10197-10204.

- 26 W. G. Zhang, X. T. Tao, C. Q. Zhang, Z. L. Gao, Y. Z. Zhang, W. T. Yu, X. F. Cheng, X. S. Liu and M. H. Jiang, *Cryst. Growth Des.*, 2008, **8**, 304-307.
- 27 C. G. Li, X. X. Tian, Z. L. Gao, Q. Wu, P. Zhao, Y. X. Sun, C. Q. Zhang, S. J. Zhang, D. L. Cui and X. T. Tao, *Cryst. Growth Des.*, 2018, **18**, 3376-3384.
- 28 Z. L. Gao, Q. Wu, X. T. Liu, Y. X. Sun and X. T. Tao, *Opt. Express*, 2015, **23**, 3851-3860.
- 29 H. Hellwig, J. Liebertz and L. Bohatý, *J. Appl. Phys.*, 2000, **88**, 240-244.
- 30 P. Zhao, Q. Wu, C. L. Li, S. J. Zhang, Y. X. Sun, C. Q. Zhang, S. Q. Xia, Z. L. Gao and X. T. Tao, *Opt. Mater. Express*, 2016, **6**, 451-458.
- 31 (a) J. J. Zhang, X. T. Tao, Y. X. Sun, Z. H. Zhang, C. Q. Zhang, Z. L. Gao, H. B. Xia and S. Q. Xia, *Cryst. Growth Des.*, 2011, **11**, 1863-1868. (b) X. X. Feng, J. J. Zhang, Z. L. Gao, S. J. Zhang, Y. X. Sun and X. T. Tao, *Appl. Phys. Lett.*, 2014, **104**, 081912-081915.
- 32 H. W. Yu, W. G. Zhang and P. S. Halasyamani, *Cryst. Growth Des.*, 2016, **16**, 1081-1087.
- 33 G. Q. Shi, Y. Wang, F. F. Zhang, B. B. Zhang, Z. H. Yang, X. L. Hou, S. L. Pan and K. R. Poeppelmeier, *J. Am. Chem. Soc.*, 2017, **139**, 10645-10648.
- 34 X. F. Wang, Y. Wang, B. B. Zhang, F. F. Zhang, Z. H. Yang and S. L. Pan, *Angew. Chem. Int. Ed.*, 2017, **56**, 14119-14123.
- 35 Z. Y. Bai, C. L. Hu, D. M. Wang, L. H. Liu, L. Z. Zhang, Y. S. Huang, F. F. Yuan and Z. B. Lin, *Chem. Commun.*, 2020, **56**, 11629-11632.
